# Supplementary material
Source: publisher site journal article supplement (https://www.dovepress.com/article/229266)
Supplement: Supplementary file 1 [file get_supplementary_file.php]

**Supplementary Material**

**eTable 1. Diagnosis codes for secondary causes of thrombocytopenia**

| **Variable listing** | | |
| --- | --- | --- |
| Nonspecific serologic evidence of human immunodeficiency virus  Acute hepatitis C with hepatic coma  Chronic hepatitis C with hepatic coma  Acute hepatitis C without mention of hepatic coma  Chronic hepatitis C without mention of hepatic coma  Primary hypercoagulable state  Hemolytic-uremic syndrome  Systemic lupus erythematosus  Viral hepatitis B with hepatic coma  Viral hepatitis B without mention of hepatic coma  Unspecified viral hepatitis C  Cachexia  Neoplasm of uncertain behavior of other lymphatic and hematopoietic tissues (including myelodysplastic syndromes)  Thrombotic microangiopathy  Defibrination syndrome  Autoimmune hemolytic anemias  Human immunodeficiency virus disease  Asymptomatic human immunodeficiency virus infection status  Malignant neoplasm of lymphatic and hematopoietic tissue  Non-hematological malignancies | | |
| **Variable** | **Code Type** | **Codes** |
| All non-cancer conditions | ICD-9-CM | 795.71, 070.41, 070.44, 070.54, 070.51, 289.81, 283.11, 710.0, 070.20, 070.21, 070.22, 070.32, 070.23, 070.33, 070.30, 070.31, 070.70, 070.71, 799.4, 238.71, 238.72, 238.73, 238.74, 238.75, 238.76, 238.77, 238.79, 446.6, 286.6, 283.0, 042" |
|  | ICD-10-CM | R75, B17.11, B18.2, B17.10, D68.51, D68.52, D68.59, D68.61, D68.62, D59.3, M32.0, M32.10, M32.11, M32.12, M32.13, M32.14, M32.15, M32.19, M32.8, M32.9, B16.2, B19.11, B16.0, B18.1, B18.0, B16.9, B19.10, B16.1, B19.20, B19.21, R64, D47.3, D46.0, D46.1, D46.20, D46.21, D46.A, D46.B, D46.4, D46.22, D46.C, D46.9, D46.Z, D47.1, D47.Z1, C94.40, C94.41, C94.42, D47.1, D47.9, D47.Z2, D47.Z9, M31.1, D65, D59.0, D59.1, B20 |
| Cancer – solid tumors | ICD-9-CM | 171.0, 171.2, 171.3, 171.4, 171.5, 171.6, 171.7, 171.8, 171.9, 176.0, 176.1, 176.2, 176.3, 176.4, 176.5, 176.8, 176.9, 189.0, 189.1, 194.0, 194.1, 194.3, 194.4, 194.5, 194.6, 194.8, 194.9, 190.0, 190.1, 190.2, 190.7, 190.3, 190.4, 190.5, 190.6, 190.8, 190.9, 192.0, 192.2, 192.8, 192.9, 192.1, 192.3, 191.0, 191.1, 191.2, 191.3, 191.4, 191.5, 191.6, 191.7, 191.8, 191.9, 170.0, 170.1, 170.2, 170.3, 170.4, 170.5, 170.6, 170.7, 170.8, 170.9, 140.0, 140.1, 140.9, 140.3, 140.4, 140.5, 140.6, 140.8, 141.0, 141.1, 141.2, 141.3, 141.4, 141.6, 141.8, 141.5, 141.9, 143.0, 143.1, 143.8, 143.9, 144.0, 144.1, 144.8, 144.9, 145.0, 145.1, 145.2, 145.3, 145.4, 145.5, 145.6, 145.8, 145.9, 142.0, 142.1, 142.2, 142.8, 142.9, 146.0, 146.1, 146.2, 146.3, 146.4, 146.6, 146.7, 146.8, 146.5, 146.9, 147.0, 147.1, 147.2, 147.3, 147.8, 147.9, 148.0, 148.1, 148.2, 148.3, 148.8, 148.9, 149.0, 149.1, 149.8, 149.9, 150.0, 150.3, 150.1, 150.4, 150.2, 150.5, 150.8, 150.9, 151.0, 151.1, 151.2, 151.3, 151.4, 151.5, 151.6, 151.8, 151.9, 153.0, 153.1, 153.2, 153.3, 153.4, 153.5, 153.6, 153.7, 153.8, 153.9, 154.0, 154.1, 155.0, 155.1, 155.2, 157.0, 157.1, 157.2, 157.3, 157.4, 157.8, 157.9, 162.2, 162.3, 162.4, 162.5, 162.8, 162.9, 172.0, 172.1, 172.2, 172.3, 172.4, 172.5, 172.6, 172.7, 172.8, 172.9, 174.0, 174.1, 174.2, 174.3, 174.4, 174.5, 174.6, 174.8, 174.9, 180.0, 180.1, 180.8, 180.9, 182.0, 182.1, 182.8, 183.0, 185, 188.0, 188.1, 188.2, 188.3, 188.4, 188.5, 188.6, 188.7, 188.8, 188.9, 193, 152.0, 152.1, 152.2, 152.3, 152.8, 152.9, 154.2, 154.3, 154.8, 156.0, 156.1, 156.2, 156.8, 156.9, 158.0, 158.8, 158.9, 159.0, 159.1, 159.8, 159.9, 162.0, 160.0, 160.1, 160.2, 160.3, 160.4, 160.5, 160.8, 160.9, 161.0, 161.1, 161.2, 161.3, 161.8, 161.9, 163.0, 163.1, 163.8, 163.9, 164.0, 164.1, 164.2, 164.3, 164.8, 164.9, 165.0, 165.8, 165.9, 175.0, 175.9, 179, 181, 184.0, 183.2, 183.3, 183.4, 183.5, 183.8, 183.9, 184.1, 184.2, 184.3, 184.4, 184.8, 184.9, 187.1, 187.2, 187.3, 187.4, 187.5, 187.6, 187.7, 187.8, 187.9, 186.0, 186.9, 189.2, 189.3, 189.4, 189.8, 189.9, 195.0, 195.1, 195.2, 195.3, 195.4, 195.5, 195.8 |
|  | ICD-10-CM | C49.0, C47.0, C49.10, C49.11, C49.12, C47.10, C47.11, C47.12, C49.20, C49.21, C49.22, C47.20, C47.21, C47.22, C49.3, C47.3, C49.4, C49.A0, C49.A1, C49.A2, C49.A3, C49.A4, C49.A5, C49.A9, C47.4, C49.5, C47.5, C49.6, C47.6, C47.8, C49.8, C49.9, C47.9, C46.0, C46.1, C46.2, C46.4, C46.50, C46.51, C46.52, C46.3, C46.7, C46.9, C64.1, C64.2, C64.9, C65.1, C65.2, C65.9, C74.00, C74.01, C74.02, C74.10, C74.11, C74.12, C74.90, C74.91, C74.92, C75.0, C75.1, C75.2, C75.3, C75.4, C75.5, C75.8, C75.9, C69.40, C69.41, C69.42, C69.60, C69.61, C69.62, C69.50, C69.51, C69.52, C69.00, C69.01, C69.02, C69.10, C69.11, C69.12, C69.20, C69.21, C69.22, C69.30, C69.31, C69.32, C69.81, C69.82, C69.80, C69.90, C69.91, C69.92, C72.20, C72.21, C72.22, C72.30, C72.31, C72.32, C72.40,  C72.41, C72.42, C72.50, C72.59, C72.0, C72.1, C72.9, C70.0, C70.9, C70.1, C71.0, C71.1, C71.2, C71.3, C71.4, C71.5, C71.6, C71.7, C71.8, C71.9, C41.0, C41.1, C41.2, C41.3, C40.00, C40.01, C40.02, C40.10, C40.11, C40.12, C41.4, C40.20, C40.21, C40.22, C40.30, C40.31, C40.32, C41.9, C40.80, C40.81, C40.82, C40.90, C40.91, C40.92, C00.0, C00.1, C00.2, C00.3, C00.4, C00.5, C00.6, C00.8, C00.9, C01, C02.0, C02.1, C02.2, C02.3, C02.4, C02.8, C02.9, C03.0, C03.1, C03.9, C04.0, C04.1, C04.8, C04.9, C06.0, C06.1, C05.0, C05.1, C05.2, C05.8, C05.9, C06.2, C06.89, C06.80, C06.9, C07, C08.0, C08.1, C08.9, C09.8, C09.9, C09.0, C09.1, C10.0, C10.1, C10.2, C10.3, C10.4, C10.8, C10.9, C11.0, C11.1, C11.2, C11.3, C11.8, C11.9, C13.0, C12, C13.1, C13.2, C13.8, C13.9, C14.0, C14.2, C14.8, C15.3, C15.4, C15.5, C15.8, C15.9, C16.0, C16.4, C16.3, C16.1, C16.2, C16.5, C16.6, C16.8, C16.9, C18.3, C18.4, C18.6, C18.7, C18.0, C18.1, C18.2, C18.5, C18.8, C18.9, C19, C20, C22.0, C22.2, C22.3, C22.7, C22.4, C22.8, C22.1, C22.9, C25.0, C25.1, C25.2, C25.3, C25.4, C25.7, C25.8, C25.9, C34.00, C34.01, C34.02, C34.10, C34.11, C34.12, C34.2, C34.30, C34.31,  C34.32, C34.80, C34.81, C34.82, C34.90, C34.91, C34.92, C43.0, C43.10, C43.11, C43.12, C43.20, C43.21, C43.22, C43.30, C43.31, C43.39, C43.4, C43.59, C43.52, C43.51, C43.60, C43.61, C43.62, C43.70, C43.71, C43.72, C43.8, C43.9, C50.011, C50.012, C50.019, C50.111, C50.112, C50.119, C50.211, C50.212, C50.219, C50.311, C50.312, C50.319, C50.411, C50.412, C50.419, C50.511, C50.512, C50.519, C50.611, C50.612, C50.619, C50.811, C50.812, C50.819, C50.911, C50.912, C50.919, C53.0, C53.1, C53.8, C53.9, C54.1, C54.2, C54.3, C54.9, C54.0, C54.8, C56.1, C56.2,  C56.9, C61, C67.0, C67.1, C67.2, C67.3, C67.4, C67.5, C67.6, C67.7, C67.8, C67.9, C73, C17.0, C17.1, C17.2, C17.3, C17.8, C17.9, C21.1, C21.0, C21.8, C21.2, C23, C24.0, C24.1, C24.8, C24.9, C48.0, C48.1, C45.1, C48.8, C48.2, C26.0, C26.1, C26.9, C33, C30.0, C30.1, C31.0, C31.1, C31.2, C31.3, C31.8, C31.9, C32.0, C32.1, C32.2, C32.3, C32.8, C32.9, C38.4, C45.0, C37, C38.0, C45.2, C38.1, C38.2, C38.8, C38.3, C39.0, C39.9, C50.021, C50.022, C50.029, C50.121, C50.122, C50.129, C50.221, C50.222, C50.229, C50.321, C50.322, C50.329, C50.421, C50.422, C50.429, C50.521, C50.522, C50.529, C50.621, C50.622, C50.629, C50.821, C50.822, C50.829, C50.921, C50.922, C50.929, C55, C58, C52, C57.00, C57.01, C57.02, C57.10, C57.11, C57.12, C57.3, C57.20, C57.21, C57.22, C57.4, C51.0, C51.1, C51.2, C51.9, C51.8, C57.7, C57.8, C57.9, C60.0, C60.1, C60.2, C60.9, C63.00, C63.01, C63.02, C63.10, C63.11, C63.12, C63.2, C60.8, C63.7, C63.8, C63.9, C62.00, C62.01, C62.02, C62.10, C62.11, C62.12, C62.90, C62.91, C62.92, C66.1, C66.2, C66.9, C68.0, C68.1, C68.8, C68.9, C76.0, C76.1, C76.2, C76.3, C76.40, C76.41, C76.42, C76.50, C76.51, C76.52, C45.7, C76.8 |
| Cancer – hematologic malignancies | ICD-9-CM | 201.00, 201.10, 201.20, 201.01, 201.11, 201.21, 201.02, 201.12, 201.22, 201.03, 201.13, 201.23, 201.04, 201.14, 201.24, 201.05, 201.15, 201.25, 201.06, 201.16, 201.26, 201.07, 201.17, 201.27, 201.08, 201.18, 201.28, 201.40, 201.41, 201.42, 201.43, 201.44, 201.45, 201.46, 201.47, 201.48, 201.50, 201.51, 201.52, 201.53, 201.54, 201.55, 201.56, 201.57, 201.58, 201.60, 201.61, 201.62, 201.63, 201.64, 201.65, 201.66, 201.67, 201.68, 201.70, 201.71, 201.72, 201.73, 201.74, 201.75, 201.76, 201.77, 201.78, 201.90, 201.91, 201.92, 201.93, 201.94, 201.95, 201.96, 201.97, 201.98, 200.00, 200.30, 200.50, 200.70, 200.80, 202.80, 200.01, 200.31, 200.51, 200.71, 200.81, 202.81, 200.02, 200.32, 200.52, 200.72, 200.82, 202.82, 200.03, 200.33, 200.53, 200.73, 200.83, 202.83, 200.04, 200.34, 200.54, 200.74, 200.84, 202.84, 200.05, 200.35, 200.55, 200.75, 200.85, 202.85, 200.06, 200.36, 200.56, 200.76, 200.86, 202.86, 200.07, 200.37, 200.57, 200.77, 200.87, 202.87, 200.08, 200.38, 200.58, 200.78, 200.88, 202.88, 200.10, 200.11, 200.12, 200.13, 200.14, 200.15, 200.16, 200.17, 200.18, 200.20, 200.21, 200.22, 200.23, 200.24, 200.25, 200.26, 200.27, 200.28, 200.40, 200.41, 200.42, 200.43, 200.44, 200.45, 200.46, 200.47, 200.48, 200.60, 200.61, 200.62, 200.63, 200.64, 200.65, 200.66, 200.67, 200.68, 202.70, 202.71, 202.72, 202.73, 202.74, 202.75, 202.76, 202.77, 202.78, 202.10, 202.11, 202.12, 202.13, 202.14, 202.15, 202.16, 202.17, 202.18,  202.20, 202.21, 202.22, 202.23, 202.24, 202.25, 202.26, 202.27, 202.28, 202.00, 202.01, 202.02, 202.03, 202.04, 202.05, 202.06, 202.07, 202.08, 202.30, 202.31, 202.32, 202.33, 202.34, 202.35, 202.36, 202.37, 202.38, 202.50, 202.51, 202.52, 202.53, 202.54, 202.55, 202.56, 202.57, 202.58, 202.60, 202.61, 202.62, 202.63, 202.64, 202.65, 202.66, 202.67, 202.68, 202.90, 202.91, 202.92, 202.93, 202.94, 202.95, 202.96, 202.97, 202.98, 202.40, 202.41, 202.42, 202.43, 202.44, 202.45, 202.46, 202.47, 202.48, 204.00, 204.01, 204.02, 204.10, 204.11, 204.12, 204.20, 204.21, 204.22, 204.80, 204.81, 204.82, 204.90, 204.91, 204.92, 205.00, 205.01, 205.02, 205.10, 205.11, 205.12, 205.20, 205.21, 205.22, 205.30, 205.31, 205.32, 205.80, 205.81, 205.82, 205.90, 205.91, 205.92, 206.00, 206.01, 206.02, 206.10, 206.11, 206.12, 206.20, 206.21, 206.22, 206.80, 206.81, 206.82, 206.90, 206.91, 206.92, 207.00, 207.01, 207.02, 207.10, 207.11, 207.12, 207.20, 207.21, 207.22,  207.80, 207.81, 207.82, 208.00, 208.01, 208.02, 208.10, 208.11, 208.12, 208.20, 208.21, 208.22, 208.80, 208.81, 208.82, 208.90, 208.91, 208.92, 203.00, 203.01, 203.02, 238.72, 238.73, 238.74, 238.75, 203.10, 203.11, 203.12, 203.80, 203.81, 203.82 |
|  | ICD-10-CM | C81.70, C81.79, C81.71, C81.72, C81.73, C81.74, C81.75, C81.76, C81.77, C81.78, C81.00, C81.09, C81.40, C81.49, C81.01, C81.41, C81.02, C81.42, C81.03, C81.43, C81.04, C81.44, C81.05, C81.45, C81.06, C81.46, C81.07, C81.47, C81.08, C81.48, C81.10, C81.19, C81.11, C81.12, C81.13, C81.14, C81.15, C81.16, C81.17, C81.18, C81.20, C81.29, C81.21, C81.22, C81.23, C81.24, C81.25, C81.26, C81.27, C81.28, C81.30, C81.39, C81.31, C81.32, C81.33, C81.34, C81.35, C81.36, C81.37, C81.38, C81.90, C81.99, C81.91, C81.92, C81.93, C81.94, C81.95, C81.96, C81.97, C81.98, C83.30, C83.39, C83.80, C83.89, C83.00, C83.09, C83.90, C83.99, C86.5, C86.6, C88.4, C85.20, C85.29, C85.90, C85.99, C86.4, C85.80, C85.89, C82.50, C82.59, C84.A0, C84.A9, C84.Z0, C84.Z9, C84.90, C84.99, C85.10, C85.19, C83.31, C83.81, C85.81, C82.51, C84.A1, C84.Z1, C84.91, C85.11, C83.01, C83.91, C85.21, C85.91, C86.0, C83.32, C83.82, C85.82, C82.52, C84.A2, C84.Z2, C84.92, C85.12, C83.02, C83.92, C85.22, C85.92, C83.33, C83.83, C85.83, C82.53, C84.A3, C84.Z3, C84.93, C83.03, C83.93, C85.13, C85.23, C85.93, C86.2, C86.3, C83.34, C83.84, C85.84, C82.54, C84.A4, C84.Z4, C84.94, C85.14, C83.04, C83.94, C85.24, C85.94, C83.35, C83.85, C85.85, C82.55, C84.A5, C84.Z5, C84.95, C85.15, C83.05, C83.95, C85.25, C85.95, C83.36, C83.86, C85.86, C82.56, C84.A6, C84.Z6, C84.96, C85.16, C83.06, C83.96, C85.26, C85.96, C83.37, C83.87, C85.87, C82.57, C84.A7, C84.Z7, C84.97, C85.17, C83.07, C83.97, C85.27, C85.97, C86.1, C83.38, C83.88, C85.88, C82.58, C84.A8, C84.Z8, C84.98, C85.18, C83.08, C83.98, C85.28, C85.98, C83.50, C83.59, C83.51, C83.52, C83.53, C83.54, C83.55, C83.56, C83.57, C83.58, C83.70, C83.79, C83.71, C83.72, C83.73, C83.74, C83.75, C83.76, C83.77, C83.78, C83.10, C83.19, C83.11, C83.12, C83.13, C83.14, C83.15, C83.16, C83.17, C83.18, C84.60, C84.69, C84.70, C84.79, C84.61, C84.71, C84.62, C84.72, C84.63, C84.73, C84.64, C84.74,  C84.65, C84.75, C84.66, C84.76, C84.67, C84.77, C84.68, C84.78, C84.40, C84.49, C84.41, C84.42, C84.43, C84.44, C84.45, C84.46, C84.47, C84.48, C84.00, C84.09, C84.01, C84.02, C84.03, C84.04, C84.05, C84.06, C84.07, C84.08, C84.10, C84.19, C84.11, C84.12, C84.13, C84.14, C84.15, C84.16, C84.17, C84.18, C82.90, C82.99, C82.00, C82.09, C82.10, C82.19, C82.20, C82.29, C82.30, C82.39, C82.40, C82.49, C82.60, C82.69, C82.80, C82.89, C82.91, C82.01, C82.11, C82.21, C82.31, C82.41, C82.61, C82.81, C82.92, C82.02, C82.12, C82.22, C82.32, C82.42, C82.62, C82.82, C82.93, C82.03, C82.13, C82.23, C82.33, C82.43, C82.63, C82.83, C82.94, C82.04, C82.14, C82.24, C82.34, C82.44, C82.64, C82.84, C82.95, C82.05, C82.15, C82.25, C82.35, C82.45, C82.65, C82.85, C82.96, C82.06, C82.16, C82.26, C82.36, C82.46, C82.66, C82.86, C82.97, C82.07, C82.17, C82.27, C82.37, C82.47, C82.67, C82.87, C82.98, C82.08, C82.18, C82.28, C82.38, C82.48, C82.68, C82.88, C96.A, C96.0, C96.2, C96.4, C96.9, C96.Z, C91.00, C91.01, C91.02, C91.10, C91.11, C91.12, C91.30, C91.31, C91.32, C91.40, C91.41, C91.42, C91.50, C91.51, C91.52, C91.60, C91.61, C91.62, C91.A0, C91.A1, C91.A2, C91.Z0, C91.Z1, C91.Z2, C91.90, C91.91, C91.92, C92.00, C92.01, C92.02, C92.10, C92.11, C92.12, C92.20, C92.21, C92.22, C92.30, C92.31, C92.32, C92.40, C92.41, C92.42, C92.50, C92.51, C92.52, C92.60, C92.61, C92.62, C92.A0, C92.A1, C92.A2, C92.Z0, C92.Z1, C92.Z2, C93.00, C93.01, C93.02, C93.10, C93.11, C93.12, C93.30, C93.31, C93.32, C93.Z0, C93.Z1, C93.Z2, C93.90, C93.91, C93.92, C94.00, C94.01, C94.02, C94.20, C94.21, C94.22, C94.30, C94.31, C94.32, C94.40, C94.41, C94.42, C94.6, C94.80, C94.81, C94.82, D45, C95.00, C95.01, C95.02, C95.10, C95.11, C95.12, C95.90, C95.91, C95.92, C90.00, C90.01, C90.02, D46.0, D46.1, D46.20, D46.21, D46.22, D46.A, D46.B, D46.C, D46.4, D46.Z, D46.9, C90.10, C90.11, C90.12, C90.20, C90.21, C90.22, C90.30, C90.31, C90.32, C88.2, C88.3, C88.8, C88.9 |

**eTable 2. Diagnosis codes for bleeding-related outcomes**

| **Variable** | **Code Type** | **Codes** |
| --- | --- | --- |
| Any bleeding | ICD-9-CM | 078.6, 246.3, 287.2, 287.8, 287.9, 360.43, 362.43, 362.81, 363.61, 363.62, 363.72, 372.72, 374.81, 376.32, 377.42, 379.23, 380.31, 423.0, 430, 431, 432.0, 432.1, 432.9, 456.0, 456.20, 459.0, 530.21, 530.82, 531.00, 531.01, 531.20, 531.21, 531.40, 531.41, 531.60, 531.61, 532.00, 532.01, 532.20,532.21, 532.40, 532.41, 532.60, 532.61, 533.00, 533.01, 533.20, 533.21, 533.40, 533.41, 533.60, 533.61, 534.00, 534.01, 534.20, 534.21, 534.40,534.41, 534.60, 534.61, 535.01, 535.11, 535.21, 535.41, 535.31, 535.51, 535.61, 535.71, 562.02, 562.03, 562.12, 562.13, 568.81, 569.3, 578.0, 578.1, 578.9, 596.7, 599.70, 599.71, 599.72, 602.1, 608.82, 620.7, 621.4, 624.5,  626.3, 626.2, 626.5, 626.6, 626.7, 626.8, 626.9, 627.0, 627.1, 629.0, 634.10, 634.11, 634.12, 635.10, 635.11, 635.12, 636.10, 636.11, 636.12, 637.10, 637.11, 637.12, 638.1, 639.1, 640.80, 640.81, 640.83, 640.90, 640.91, 640.93, 641.10, 641.11, 641.13, 641.30, 641.31, 641.33, 641.80, 641.81, 641.83, 641.90, 641.91, 641.93, 656.00, 656.01, 656.03, 665.70, 665.71, 665.72, 665.74, 666.00, 666.02, 666.04, 666.10, 666.12, 666.14, 666.20, 666.22, 666.24, 666.30, 666.32, 666.34, 719.10, 719.11, 719.12, 719.13, 719.14, 719.15, 719.16, 719.17, 719.18, 719.19, 762.1, 767.11, 770.3, 772.10,772.11, 772.12, 772.13, 772.14, 772.2, 772.3, 772.4, 772.6, 772.8, 772.9, 777.3, 782.7, 784.7, 784.8, 786.30, 786.31, 786.39, 791.2, 800.20, 800.21, 800.22, 800.23, 800.24, 800.25, 800.26, 800.29, 800.30, 800.31, 800.32,800.33, 800.34, 800.35, 800.36, 800.39, 800.70, 800.71, 800.72, 800.73, 800.74, 800.75, 800.76, 800.79, 800.80, 800.81, 800.82, 800.83, 800.84, 800.85, 800.86, 800.89, 801.20, 801.21, 801.22, 801.23, 801.24, 801.25, 801.26, 801.29, 801.30, 801.31, 801.32, 801.33, 801.34, 801.35, 801.36, 801.39, 801.70, 801.71, 801.72, 801.73, 801.74, 801.75, 801.76, 801.79, 801.80, 801.81, 801.82, 801.83, 801.84, 801.85, 801.86, 801.89, 803.20, 803.21, 803.22, 803.23, 803.24, 803.25, 803.26, 803.29, 803.30, 803.31, 803.32, 803.33, 803.34, 803.35, 803.36, 803.39, 803.70, 803.71, 803.72, 803.73, 803.74, 803.75, 803.76, 803.79, 803.80, 803.81, 803.82, 803.83, 803.84, 803.85, 803.86, 803.89, 804.20, 804.21, 804.22, 804.23, 804.24, 804.25, 804.26, 804.29, 804.30, 804.31, 804.32, 804.33, 804.34, 804.35, 804.36, 804.39, 804.70, 804.71, 804.72, 804.73, 804.74, 804.75, 804.76, 804.79, 804.80, 804.81, 804.82, 804.83, 804.84, 804.85, 804.86, 804.89, 852.00, 852.01, 852.02, 852.03, 852.04, 852.05, 852.06, 852.09, 852.10, 852.11, 852.12, 852.13, 852.14, 852.15, 852.16, 852.19, 852.20, 852.21, 852.22, 852.23, 852.24, 852.25, 852.26, 852.29, 852.30, 852.31, 852.32, 852.33, 852.34, 852.35, 852.36, 852.39, 852.40, 852.41, 852.42, 852.43, 852.44, 852.45, 852.46, 852.49, 852.50, 852.51, 852.52, 852.53, 852.54, 852.55, 852.56, 852.59, 853.00, 853.01, 853.02, 853.03, 853.04, 853.05, 853.06, 853.09, 853.10, 853.11, 853.12, 853.13, 853.14, 853.15, 853.16, 853.19, 864.01, 864.11, 865.01, 865.11, 866.01, 866.11, 997.02, 998.11, 998.12 |
|  | ICD-10-CM | A98.5, D69.2, D69.8, D69.9, H44.811, H44.812, H44.813, H44.819, H35.731,  H35.732, H35.733, H35.739, H35.60, H35.61, H35.62, H35.63, H31.301, H31.302,  H31.303, H31.309, H31.311, H31.312, H31.313, H31.319, H31.411, H31.412,  H31.413, H31.419, H11.30, H11.31, H11.32, H11.33, H05.231, H05.232, H05.233,  H05.239, H47.021, H47.022, H47.023, H47.029, H43.10, H43.11, H43.12, H43.13,  H61.121, H61.122, H61.123, H61.129, I31.2, I60.00, I60.01, I60.02, I60.10,  I60.11, I60.12, I60.2, I60.30, I60.31, I60.32, I60.4, I60.50, I60.51, I60.52,  I60.6, I60.7, I60.8, I60.9, I61.0, I61.1, I61.2, I61.3, I61.4, I61.5, I61.6,  I61.8, I61.9, I62.1, I62.00, I62.01, I62.02, I62.03, I62.9, I85.01, I85.11,  R58, K22.11, K25.0, K25.2, K25.4, K25.6, K26.0, K26.2, K26.4, K26.6, K27.0,  K27.2, K27.4, K27.6, K28.0, K28.2, K28.4, K28.6, K29.01, K29.41, K29.51,  K29.61, K29.31, K29.21, K29.71, K29.91, K29.81, K57.01, K57.11, K57.13, K57.21,  K57.31, K57.33, K57.41, K57.51, K57.53, K57.81, K57.91, K57.93, K66.1, K62.5,  K92.0, K92.1, K92.2, R31.9, R31.0, R31.1, R31.21, R31.29, N42.1, R36.1, N83.7,  N85.7, N92.2, N92.0, N92.3, N92.1, N93.0, N92.5, N93.1, N93.8, N93.9, N92.6,  N92.4, N95.0, O03.1, O03.6, O04.6, O07.1, O08.1, O20.8, O20.9, O44.10, O44.11,  O44.12, O44.13, O44.30, O44.31, O44.32, O44.33, O44.50, O44.51, O44.52, O44.53,  O46.001, O46.002, O46.003, O46.009, O46.011, O46.012, O46.013, O46.019, O46.021, O46.022, O46.023, O46.029, O46.091, O46.092, O46.093, O46.099, O46.8X1, O46.8X2, O46.8X3, O46.8X9, O46.90, O46.91, O46.92, O46.93, O45.001, O45.002, O45.003, O45.009, O45.011, O45.012, O45.013, O45.019, O45.021, O45.022, O45.023, O45.029, O45.091, O45.092, O45.093, O45.099, O67.0, O67.8, O67.9, O43.011, O43.012, O43.013, O43.019, O71.7, O72.0, O72.1, O72.2, O72.3, M25.00, M25.011, M25.012, M25.019, M25.021, M25.022, M25.029, M25.031, M25.032, M25.039, M25.041, M25.042, M25.049, M25.051, M25.052, M25.059, M25.061, M25.062, M25.069, M25.071, M25.072, M25.073, M25.074, M25.075, M25.076, M25.08, P02.1, P12.2, P26.0, P26.1, P26.8, P26.9, P52.0, P52.1, P52.21, P52.22, P52.3, P52.4, P52.5, P52.6, P52.8, P52.9, P54.0, P54.1, P54.2, P54.3, P54.4, P54.5, P54.6, P54.8, P54.9, P51.0, P51.8, P51.9, P54.0, P54.1, P54.2, P54.3, P54.4, P54.5, P54.6, P54.8, P54.9, P78.2, R23.3, R04.0, R04.1, R04.2, R04.81, R04.89, R04.9, R82.3, S06.4X0A, S06.4X0D, S06.4X0S, S06.4X1A, S06.4X1D, S06.4X1S, S06.4X2A, S06.4X2D, S06.4X2S, S06.4X3A, S06.4X3D, S06.4X3S, S06.4X4A, S06.4X4D, S06.4X4S, S06.4X5A, S06.4X5D, S06.4X5S, S06.4X6A, S06.4X6D, S06.4X6S, S06.4X7A, S06.4X7D, S06.4X7S, S06.4X8A, S06.4X8D, S06.4X8S, S06.4X9A, S06.4X9D, S06.4X9S, S06.5X0A, S06.5X0D, S06.5X0S, S06.5X1A, S06.5X1D, S06.5X1S, S06.5X2A, S06.5X2D, S06.5X2S, S06.5X3A, S06.5X3D, S06.5X3S, S06.5X4A, S06.5X4D, S06.5X4S, S06.5X5A, S06.5X5D, S06.5X5S, S06.5X6A, S06.5X6D, S06.5X6S, S06.5X7A, S06.5X7D, S06.5X7S, S06.5X8A, S06.5X8D, S06.5X8S, S06.5X9A, S06.5X9D, S06.5X9S, S06.6X0A, S06.6X0D, S06.6X0S, S06.6X1A, S06.6X1D, S06.6X1S, S06.6X2A, S06.6X2D, S06.6X2S, S06.6X3A, S06.6X3D, S06.6X3S, S06.6X4A, S06.6X4D, S06.6X4S, S06.6X5A, S06.6X5D, S06.6X5S, S06.6X6A, S06.6X6D, S06.6X6S, S06.6X7A, S06.6X7D, S06.6X7S, S06.6X8A, S06.6X8D, S06.6X8S, S06.6X9A, S06.6X9D, S06.6X9S, S06.340A, S06.340D, S06.340S, S06.341A, S06.341D, S06.341S, S06.342A, S06.342D, S06.342S, S06.343A, S06.343D, S06.343S, S06.344A, S06.344D, S06.344S, S06.345A, S06.345D, S06.345S, S06.346A, S06.346D, S06.346S, S06.347A, S06.347D, S06.347S, S06.348A, S06.348D, S06.348S, S06.349A, S06.349D, S06.349S, S06.350A, S06.350D, S06.350S, S06.351A, S06.351D, S06.351S, S06.352A, S06.352D, S06.352S, S06.353A, S06.353D, S06.353S, S06.354A, S06.354D, S06.354S, S06.355A, S06.355D, S06.355S, S06.356A, S06.356D, S06.356S, S06.357A, S06.357D, S06.357S, S06.358A, S06.358D, S06.358S, S06.359A, S06.359D, S06.359S, S06.360A, S06.360D, S06.360S, S06.361A, S06.361D, S06.361S, S06.362A, S06.362D, S06.362S, S06.363A, S06.363D, S06.363S, S06.364A, S06.364D, S06.364S, S06.365A, S06.365D, S06.365S, S06.366A, S06.366D, S06.366S, S06.367A, S06.367D, S06.367S, S06.368A, S06.368D, S06.368S, S06.369A, S06.369D, S06.369S, S06.370A, S06.370D, S06.370S, S06.371A, S06.371D, S06.371S, S06.372A, S06.372D, S06.372S, S06.373A, S06.373D, S06.373S, S06.374A, S06.374D, S06.374S, S06.375A, S06.375D, S06.375S, S06.376A, S06.376D, S06.376S, S06.377A, S06.377D, S06.377S, S06.378A, S06.378D, S06.378S, S06.379A, S06.379D, S06.379S, S06.380A, S06.380D, S06.380S, S06.381A, S06.381D, S06.381S, S06.382A, S06.382D, S06.382S, S06.383A, S06.383D, S06.383S, S06.384A, S06.384D, S06.384S, S06.385A, S06.385D, S06.385S, S06.386A, S06.386D, S06.386S, S06.387A, S06.387D, S06.387S, S06.388A, S06.388D, S06.388S, S06.389A, S06.389D, S06.389S, S36.112A, S36.112D, S36.112S, S36.020A, S36.020D, S36.020S, S36.021A, S36.021D, S36.021S, S36.029A, S36.029D, S36.029S, S37.011A, S37.011D, S37.011S, S37.012A, S37.012D, S37.012S, S37.019A, S37.019D, S37.019S, S37.021A, S37.021D, S37.021S, S37.022A, S37.022D, S37.022S, S37.029A, S37.029D, S37.029S, I97.810, I97.811, I97.820, I97.821, D78.01, D78.02,D78.21, D78.22, D78.31, D78.32, E36.01, E36.02, E89.810, E89.811, E89.820, E89.821, G97.31, G97.32, G97.61, G97.51, G97.52, G97.62, H59.111, H59.112, H59.113, H59.119, H59.121, H59.122, H59.123, H59.129, H59.311, H59.312, H59.313, H59.319, H59.321, H59.322, H59.323, H59.329, H59.331, H59.332, H59.333, H59.339, H59.341, H59.342, H59.343, H59.349, H95.21, H95.22, H95.41, H95.42, H95.51, H95.52, I97.410, I97.411, I97.418, I97.42, I97.610, I97.611, I97.618, I97.620, I97.621, I97.630, I97.631, I97.638, J95.61, J95.62, J95.830, J95.831, J95.860,  J95.861, K91.61, K91.62, K91.840, K91.841, K91.870, K91.871, L76.01, L76.02, L76.21, L76.22, L76.31, L76.32, M96.810, M96.811, M96.830, M96.831, M96.840, M96.841, N99.61, N99.62, N99.820, N99.821, N99.840, N99.841 |
| Intracranial hemorrhage | ICD-9-CM | 430, 431, 432.0, 432.1, 432.9 |
|  | ICD-10-CM | I60.00, I60.01, I60.02, I60.10, I60.11, I60.12, I60.2, I60.30, I60.31, I60.32, I60.4, I60.50, I60.51, I60.52, I60.6, I60.7, I60.8, I60.9, I61.0, I61.1, I61.2, I61.3, I61.4, I61.5, I61.6, I61.8, I61.9, I62.00, I62.01, I62.02, I62.03, I62.1, I62.9" |
| Gastrointestinal hemorrhage | ICD-9-CM | 569.3, 578.0, 578.1, 578.9 |
|  | ICD-10-CM | K62.5, K92.0, K92.1, K92.2 |
| Hematuria | ICD-9-CM | 599.70, 599.71, 599.72 |
|  | ICD-10-CM | R31.0, R31.1, R31.21, R31.29, R31.9 |
| Ecchymosis | ICD-9-CM | 782.7 |
|  | ICD-10-CM | R23.3 |
| Epistaxis | ICD-9-CM | 784.7 |
|  | ICD-10-CM | R04.0 |

**eTable 3. Cumulative incidence (%) of ITP treatments following ITP diagnosis.**

|  | **Days Following ITP Diagnosis** | | | | | | | |  | | |
| --- | --- | --- | --- | --- | --- | --- | --- | --- | --- | --- | --- |
| **ITP Treatment** | **30 days** | | **90 days** | | **12 months** | | **18 months** | | **24 months** | | |
|  | Cumulative Incidence, % (95% confidence interval) | | | | | | | |  | | |
| First-line therapies | | | | | | | | | | |
| Oral steroids | 35 (31, 40) | | 41 (37, 46) | | 50 (46, 55) | | 55 (50, 59) | | 56 (51, 61) | | |
| IVIg | 9 (7, 12) | | 11 (8, 14) | | 12 (9, 15) | | 13 (10, 17) | | 14 (11, 18) | | |
| IV anti-D | 1 (0, 2) | | 1 (0, 2) | | 1 (0, 2) | | 1 (0, 2) | | 1 (0, 2) | | |
| Common second-line options | | | | | | | | | | |
| Rituximab | | 8 (6, 11) | | 11 (8, 14) | | 16 (12, 19) | | 16 (13, 20) | | 18 (14, 21) | | |
| Romiplostim | | 5 (4, 8) | | 7 (5, 9) | | 9 (7, 12) | | 10 (7, 13) | | 10 (8, 14) | | |
| Eltrombopag | | 2 (1, 4) | | 3 (2, 5) | | 5 (3, 8) | | 6 (4, 9) | | 6 (4, 9) | | |
| Other | |  | |  | |  | |  | |  | | |
| IV steroids | | 10 (7, 13) | | 16 (12, 19) | | 26 (22, 30) | | 29 (25, 34) | | 34 (29, 39) | | |
| Splenectomy | | 1 (0, 2) | | 2 (1, 4) | | 4 (2, 6) | | 4 (2, 6) | | 4 (2, 6) | | |
| Platelet transfusion | | 1 (1, 3) | | 2 (1, 4) | | 3 (1, 5) | | 3 (1, 5) | | 3 (2, 5) | | |
